# Supplementary material for: Laguncularia racemosa Phenolics Profiling by Three-Phase Solvent System Step-Gradient Using High-Performance Countercurrent Chromatography with Off-Line Electrospray Mass-Spectrometry Detection
Source: MDPI journal article supplement (doi:10.3390/molecules26082284), 2021-04-15
Supplement: s1 [file s1]

# ***Laguncularia racemosa* metabolite profiling by three-phase solvent system step-gradient using high-performance countercurrent chromatography with *off-line* ESI-MS/MS detection**

Fernanda das Neves Costa <sup>1\*</sup>, Gerold Jerz <sup>2</sup>, Peter Hewitson <sup>3</sup>,

Fabiana de Souza Figueiredo <sup>1</sup>, Svetlana Ignatova <sup>3</sup>

<sup>1</sup> Federal University of Rio de Janeiro, Institute of Natural Products Research, CCS, Bloco H, Ilha do Fundão, RJ 21941-11 590, Brazil

<sup>2</sup> Institute of Food Chemistry, Technische Universität Braunschweig, Schleinitzstrasse 20, 38106 Braunschweig, Germany

<sup>3</sup> Advanced Bioprocessing Centre, Department of Chemical Engineering, Brunel University London, UB8 3PH, UK

\*fncosta@ippn.ufrj.br

## **Supplementary Material**

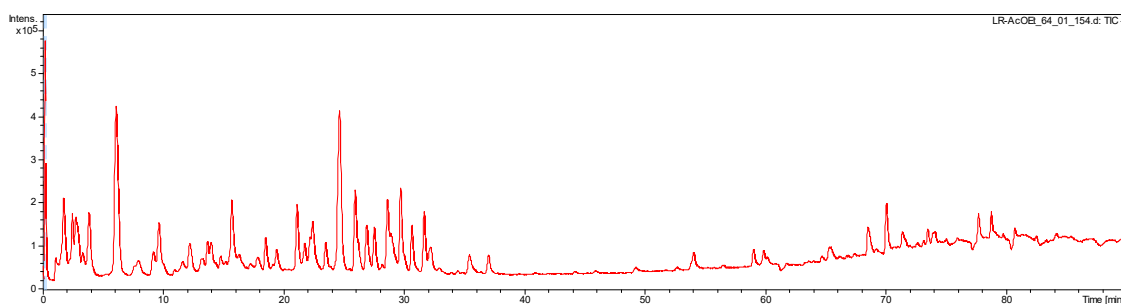

**Supplementary Figure S1.** EtOAcPart preliminary analysis by LC-ESI-TOF-MS. The mobile phase was methanol (B) and water (A) containing 0.05% (v/v) formic acid. The linear gradient elution was set from 10% to 100% of B in 90 min.

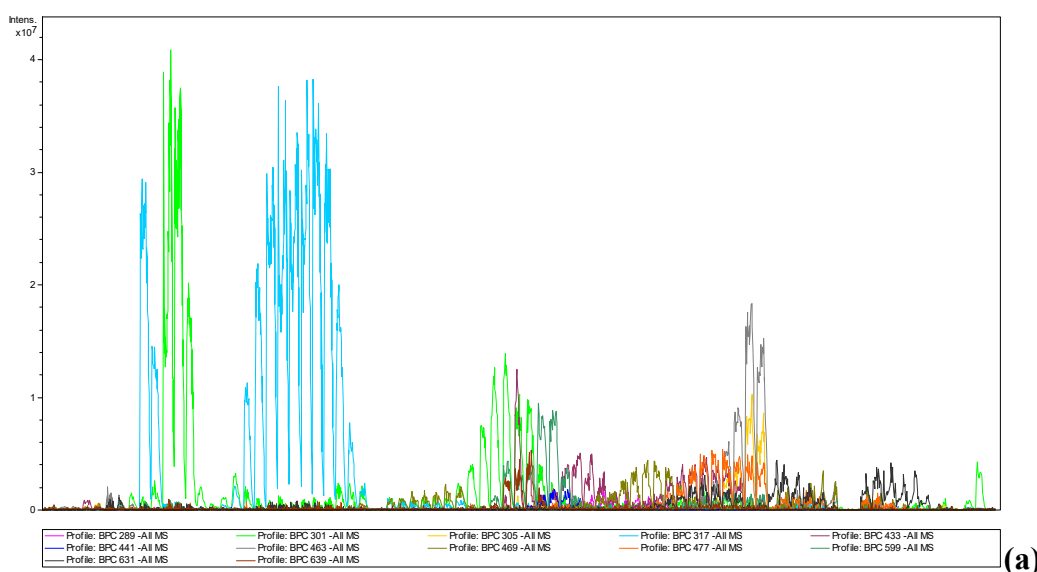

**(a)**

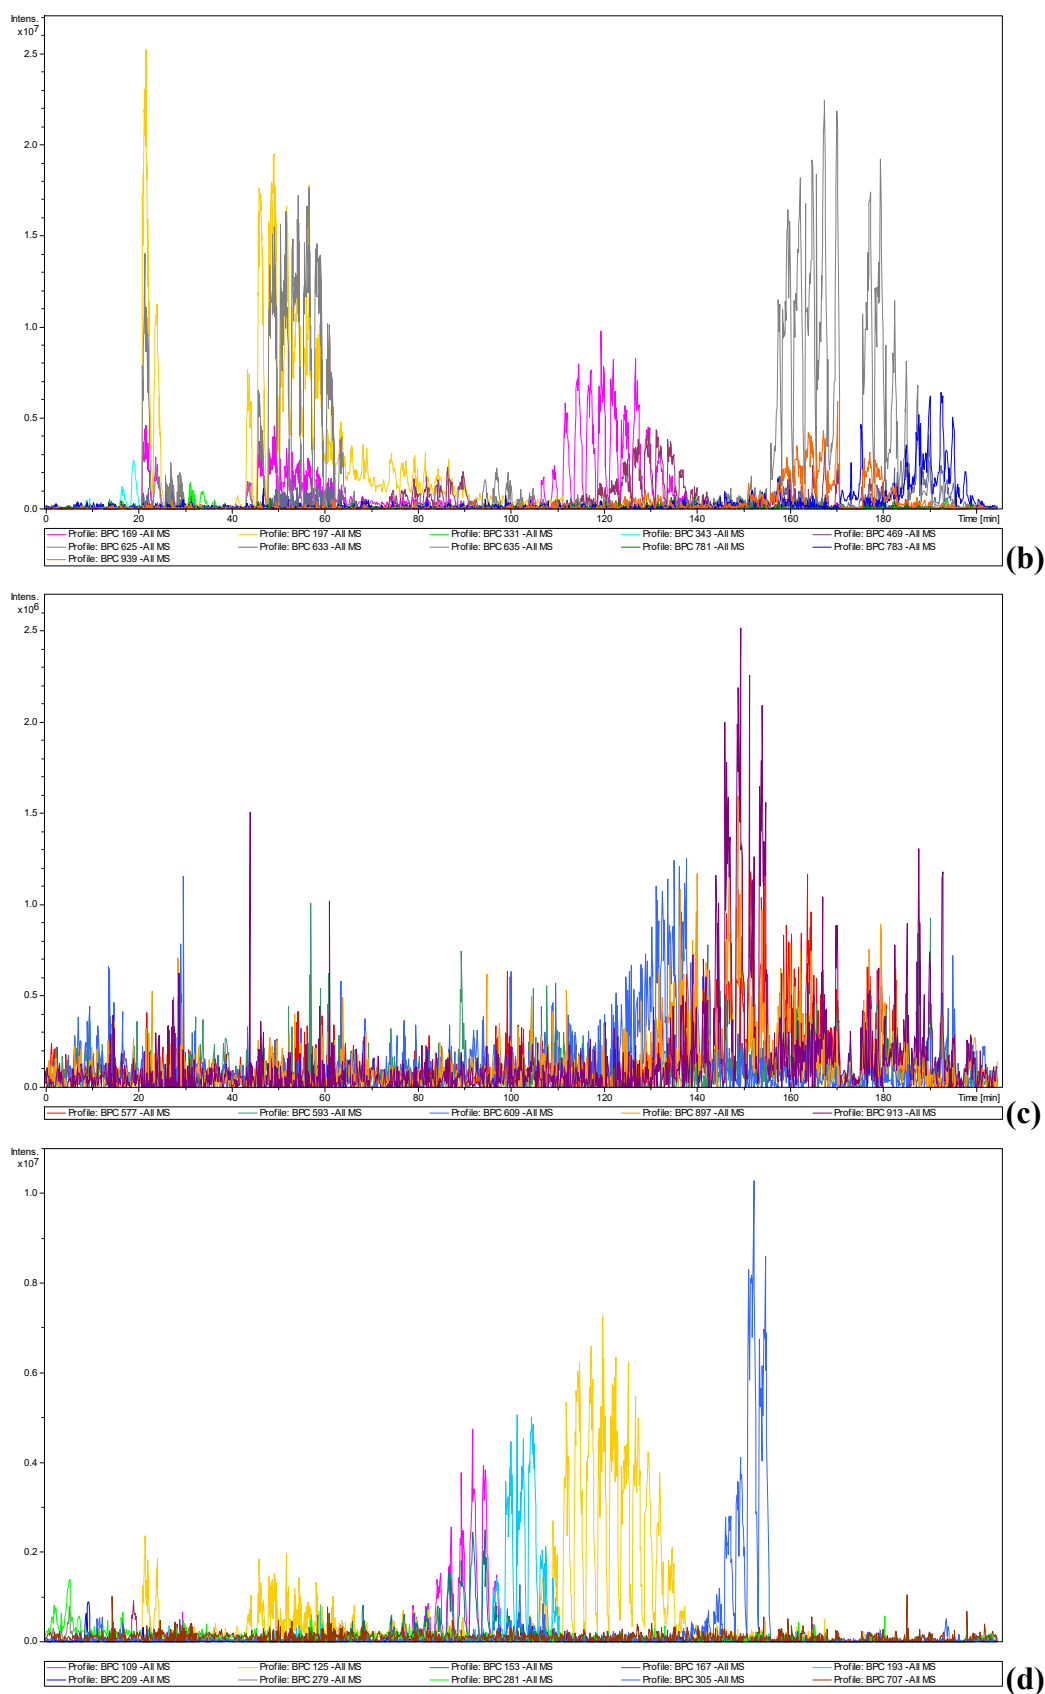

**Supplementary Figure S2.** HPLC off-line injection ESI-MS/MS profile of the the EtOAc Part by use of selected single ion traces for target compounds or classes. (a) Flavonoids, (b) Hydrolysable tannins, (c) Condensed tannins and (d) other compounds.

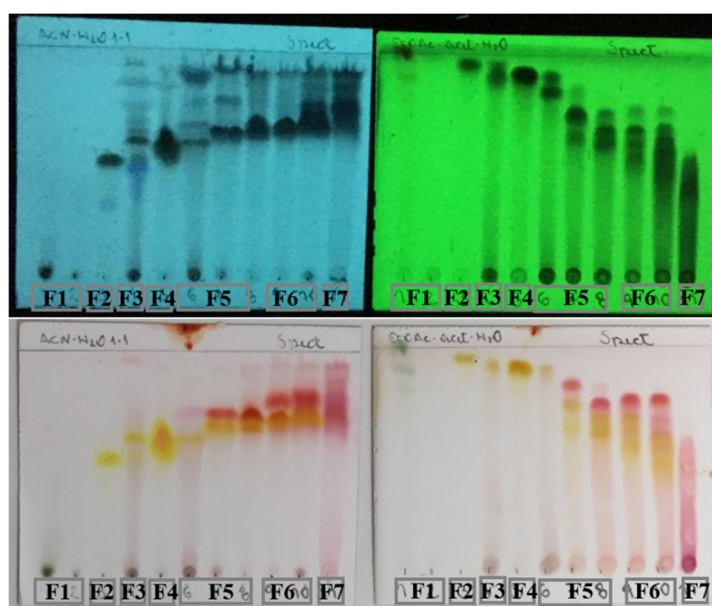

**Supplementary Figure S3.** TLC analysis of *L. racemosa* CCC combined fractions. On the left: reversed phase silica gel TLC plates developed with acetonitrile-H<sub>2</sub>O 1:1 (v/v). On the right: Normal phase silica gel TLC plates developed with EtOAc-acetone-H<sub>2</sub>O 25:15:10 (v/v/v). Visualization was done using  $\lambda$  254 nm UV light and spray-reagent H<sub>2</sub>SO<sub>4</sub> 10% and vanillin 5%. F means a group of jointed fractions according to TLC similarity.

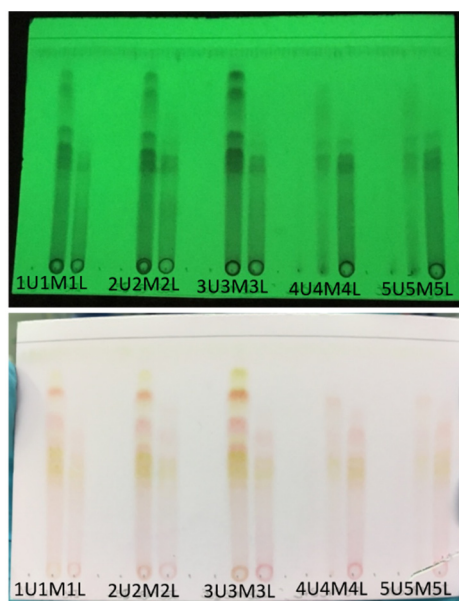

**Supplementary Figure S4.** Three-phase solvent system test by TLC. HPLC solvent system: *n*-hexane-*tert*.butyl-methyl ether-ACN-H<sub>2</sub>O (1) 1-1-2-1, (2) 2-1-3-2, (3) 2-2-3-2, (4) 2-3-3-2 and (5) 3-5-5-2 (v/v); (U) upper, (M) middle and (L) lower phases. Normal

phase silica gel TLC plates developed with EtOAc-acetone-H<sub>2</sub>O 25:15:10 (v/v/v), visualized using  $\lambda$  254 nm UV light and spray-reagent H<sub>2</sub>SO<sub>4</sub> 10% and vanillin 5%.
